# Supplementary material
Source: Springer Nature journal article supplement (https://www.springermedizin.de/resource/supplementary/12879_2013_4171_MOESM2_ESM.pdf/9446892)

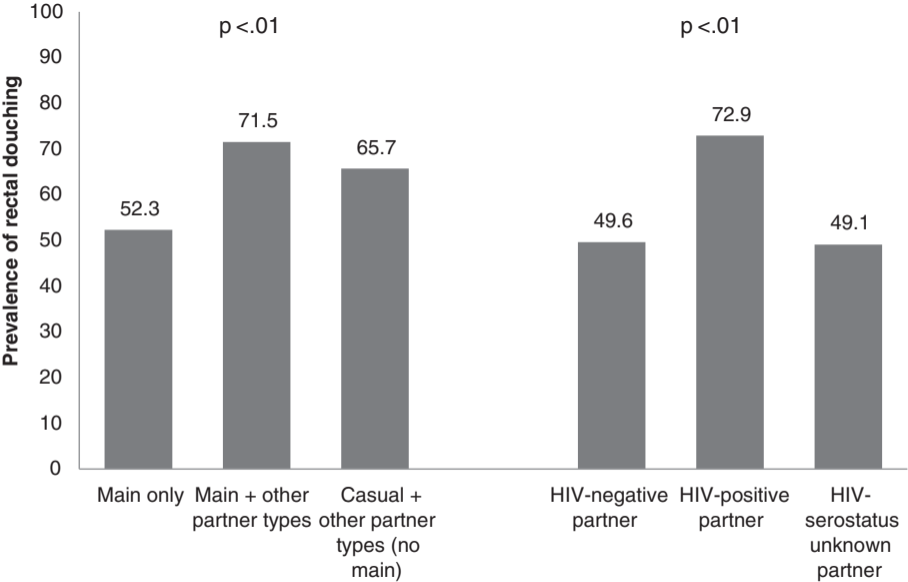

Among HIV-negative respondents

Supplement: MOESM2 [file 9446892]
